# Supplementary material for: Mediation role of alexithymia, sensory processing sensitivity and emotional-mental processes between childhood trauma and adult psychopathology: a self-report study
Source: Research Square preprint supplement (doi:10.21203/rs.3.rs-605863/v1), 2021-06-15
Supplement: Supplementary file 1 [file f1e1f0da4848acf092a9f526.docx]

| Table 1 | | | | | | |
| --- | --- | --- | --- | --- | --- | --- |
| Descriptive statistics and t values according to gender | | | | | | |
|  | Gender | | | |  |  |
|  | Female (*N* =266) | | Male (*N* = 71) | |  |  |
|  | M | SD | M | SD |  |  |
| CTQ | 39.43 | 14.75 | 39.86 | 16.34 | -0.21 |  |
| TAS-26 | 59.59 | 12.66 | 58.34 | 14.32 | 0.72 |  |
| SPS | 128.25 | 21.03 | 119.22 | 19.03 | 3.27*** |  |
| EYES | 24.43 | 2.95 | 23.22 | 3.71 | 2.89** |  |
| BSI | 119.47 | 41.82 | 109.84 | 42.30 | 1.72 |  |
| Note 1. BSI= Brief Symptom Inventory, SPS= Sensory Processing Sensitivity Scale, TAS-26= Toronto Alexithymia Scale, CTQ= Childhood Trauma Questionnaire, EYES= Reading Mind in The Eyes Test | | | | | | |
| Note 2*.* *** *p* < .001, ** *p* < .01, * *p* < .05. | | | | | | |

| Table 2 | | | | | | |
| --- | --- | --- | --- | --- | --- | --- |
| Partial Correlations Between All Variables | | | | | | |
|  | CTQ | TAS-26 | SPS | EYES | BSI |  |
| CTQ | --- |  |  |  |  |  |
| TAS-26 | 0.33*** | --- |  |  |  |  |
| SPS | 0.24*** | 0.20*** | --- |  |  |  |
| EYES | -0.08 | -0.09 | 0.05 | --- |  |  |
| BSI | 0.05*** | 0.57*** | 0.47*** | 0.04 | --- |  |
| Note 1. BSI= Brief Symptom Inventory, SPS= Sensory Processing Sensitivity Scale, TAS-26= Toronto Alexithymia Scale, CTQ= Childhood Trauma Questionnaire, EYES= Reading Mind in The Eyes Test | | | | | | |
| Note 2*.* *** *p* < .001, ** *p* < .01, * *p* < .05. | | | | | | |
| Note 3. The results were obtained after controlling for the effect of the gender variable. | | | | | | |
